# Supplementary material for: National Cross-Sectional Study of Community-Based Adverse Drug Reactions in Saudi Arabia
Source: PubMed Central journal article supplement — Drugs Real World Outcomes. 2020 Mar 25;7(2):161–70. doi: 10.1007/s40801-020-00186-8 (PMC7221044; doi:10.1007/s40801-020-00186-8), 2020-03-25
Supplement: 40801_2020_186_MOESM1_ESM.pdf [file 40801_2020_186_MOESM1_ESM.pdf]

Journal: Drugs - Real World Outcomes

Title: National study of community based adverse drug reactions in Saudi Arabia: A cross-sectional study

Authors and Affiliations:

Rasha A. Almubark<sup>1</sup>, Rawabi H. Aljadani<sup>1</sup>, Amani S. Alqahtani<sup>1</sup>, Thamir M. Alshammari<sup>1,2</sup>,  
Nasser F. BinDhim<sup>1,3</sup>

1 Saudi Food and Drug Authority, Riyadh, Saudi Arabia

2 Medication Safety Research Chair, King Saud University, Riyadh, Saudi Arabia

3 Alfaisal University, College of Medicine, Riyadh, Saudi Arabia

Corresponding author:

Rasha Almubark

6336 Northern Ring Branch Rd, 33726 Riyadh 13312 6336

E-mail: ralmubark@hotmail.com

## Pharmacy Questionnaire

### استبيان الصيدلية

Hello, The Saudi Food and Drug Authority is conducting an anonymous survey of Saudi Arabian community about medication and adverse events. Would you like to participate in the study?

- **If Yes start with the Qualifying Questions**
- **If No Thank respondent and end the interview**

مرحباً، اسمي \_\_\_\_\_ من هيئة الغذاء والدواء، صممنا استبياناً مجهول الهوية للبحث والحد من الآثار الجانبية للدواء وسيتم التحفظ على سرية المعلومات والأجوبة واستخدامها فقط لأغراض البحث في الصحة العامة هل ترغب في المشاركة

- إذا كان الجواب نعم انتقل الى أسئلة الأهلية
- إذا كان الجواب لا اشكر المشارك ثم انه الاستبيان

## Qualifying Questions

### أسئلة الأهلية

|                                                                                                                                                       |                                                                                                                                        |
|-------------------------------------------------------------------------------------------------------------------------------------------------------|----------------------------------------------------------------------------------------------------------------------------------------|
| How old are you?<br><br>_____<br><b>[IF &lt;18, END SURVEY]</b><br><br><b>[DO NOT ASK – RECORD GENDER OF PARTICIPANT]</b><br><br>1. Male<br>2. Female | كم عمرك؟<br><br>_____<br><b>[إذا كان أقل من 18، انه الاستبيان]</b><br><br><b>[لا تسأل – سجّل جنس المشارك]</b><br><br>1. ذكر<br>2. أنثى |
|-------------------------------------------------------------------------------------------------------------------------------------------------------|----------------------------------------------------------------------------------------------------------------------------------------|

|                                             |                                                    |
|---------------------------------------------|----------------------------------------------------|
| What region of Saudi Arabia do you live in? | في أي منطقة من المملكة العربية السعودية تعيش فيها؟ |
| 1. Al Jawf (or Jouf)                        | 1. الجوف                                           |
| 2. Northern Borders                         | 2. الحدود الشمالية                                 |
| 3. Tabuk                                    | 3. تبوك                                            |
| 4. Ha'il                                    | 4. حائل                                            |
| 5. Al Madinah                               | 5. المدينة                                         |
| 6. Al Qasim                                 | 6. القصيم                                          |
| 7. Makkah                                   | 7. مكة                                             |
| 8. Al Riyadh                                | 8. الرياض                                          |
| 9. Eastern Province                         | 9. المنطقة الشرقية                                 |
| 10. Al Bahah (or Baha)                      | 10. الباحة                                         |
| 11. Asir                                    | 11. عسير                                           |
| 12. Jizan                                   | 12. جيزان                                          |
| 13. Najran                                  | 13. نجران                                          |

## Demographic Questions

## أسئلة ديموغرافية

|                                             |                                    |
|---------------------------------------------|------------------------------------|
| What is your highest level of education?    | ما هو أعلى مستوى تعليمي حصلت عليه؟ |
| 1. Have not completed elementary school     | 1. لم أكمل المدرسة الابتدائية      |
| 2. Completed through elementary school only | 2. أكملت المدرسة الابتدائية فقط    |
| 3. Completed through secondary school only  | 3. أكملت المدرسة المتوسطة فقط      |
| 4. Graduated high school                    | 4. تخرجت من المدرسة الثانوية       |
| 5. Diploma                                  | 5. حاصل على دبلوم                  |
| 6. Bachelor's degree                        | 6. شهادة بكالوريوس                 |
| 7. Master's degree                          | 7. شهادة ماجستير                   |
| 8. Doctorate degree                         | 8. شهادة دكتوراه                   |
| 9. DK/Refused [DO NOT READ]                 | 9. لا أعرف/أرفض [لا تقرأ]          |

|                                                                                                                                                                                                                                                                                                                                                                                                                                                                                                                                                                                                                |                                                                                                                                                                                                                                                                                                                                                                                                                                                                                                                                                                               |
|----------------------------------------------------------------------------------------------------------------------------------------------------------------------------------------------------------------------------------------------------------------------------------------------------------------------------------------------------------------------------------------------------------------------------------------------------------------------------------------------------------------------------------------------------------------------------------------------------------------|-------------------------------------------------------------------------------------------------------------------------------------------------------------------------------------------------------------------------------------------------------------------------------------------------------------------------------------------------------------------------------------------------------------------------------------------------------------------------------------------------------------------------------------------------------------------------------|
| <p>Has a doctor or other health professional ever told you that you have</p> <ol style="list-style-type: none"> <li>1. High blood pressure</li> <li>2. High Cholesterol</li> <li>3. Diabetes</li> <li>4. Cardiovascular disease</li> <li>5. Chronic Lung Disease-Asthma and Emphysema</li> <li>6. Osteoporosis and rheumatoid arthritis</li> <li>7. Depression or anxiety disorder</li> <li>8. Cancer</li> <li>9. Kidney Disease</li> <li>10. Thyroid Disease</li> <li>11. Gastrointestinal Diseases</li> <li>12. Other chronic disease</li> <li>13. Have never been diagnosed with chronic disease</li> </ol> | <p>2. هل تم تشخيصك من قبل طبيب أو أي مختص طبي على أي من هذه الامراض؟</p> <ol style="list-style-type: none"> <li>1. ارتفاع ضغط الدم</li> <li>2. ارتفاع الكوليسترول</li> <li>3. مرض السكري</li> <li>4. أمراض القلب والاعوية الدموية</li> <li>5. أمراض الرئة المزمنة مثل (الربو أو انتفاخ الرئة)</li> <li>6. التهاب المفاصل أو الروماتيزم</li> <li>7. الاكتئاب أو اضطراب القلق</li> <li>8. السرطان</li> <li>9. أمراض الكلى</li> <li>10. أمراض الغدة الدرقية</li> <li>11. مشاكل الجهاز الهضمي</li> <li>12. أمراض مزمنة أخرى</li> <li>13. لم يتم تشخيصي باي أمراض سابقة</li> </ol> |
|----------------------------------------------------------------------------------------------------------------------------------------------------------------------------------------------------------------------------------------------------------------------------------------------------------------------------------------------------------------------------------------------------------------------------------------------------------------------------------------------------------------------------------------------------------------------------------------------------------------|-------------------------------------------------------------------------------------------------------------------------------------------------------------------------------------------------------------------------------------------------------------------------------------------------------------------------------------------------------------------------------------------------------------------------------------------------------------------------------------------------------------------------------------------------------------------------------|

## Adverse Event Questions

### أسئلة الأعراض الجانبية

Now I'm going to talk to you about adverse drug reactions. An adverse drug reaction is a response to a drug which is noxious and unintended, and which occurs at doses normally used in humans. Thinking of prescription, non-prescription and herbal drugs, have you experienced a/some adverse drug reactions during the past year?

1. Yes
2. No [END INTERVIEW]
3. Dk/refused [END INTERVIEW]

سأتحدث معك الآن عن الأعراض الجانبية للدواء. العرض الجانبي للدواء هو تأثير سلبي غير مقصود للدواء، وقد تظهر عند أخذ الجرعات المستخدمة عادة. هل عانيت من أعراض جانبية للأدوية – سواء الأدوية أو الأدوية العشبية -خلال العام الماضي؟

1. نعم
2. لا [انه المقابلة]
3. لا أعرف/أرفض [ انه المقابلة]

*Please describe the primary adverse drug reaction. If you have experienced more than one adverse drug reaction, please specify the adverse drug reaction that impacted you the most.*

يرجى وصف العرض الجانبي الأساسي. إذا كنت عانيت من أكثر من جانب واحد من الأعراض ، يرجى تحديد العرض الجانبي الذي أثر عليك كثيرا .

|                                                                                                                                                                                                                                                                                                                                                                                                                                                                             |                                                                                                                                                                                                                                                                                                                                                                                                                               |
|-----------------------------------------------------------------------------------------------------------------------------------------------------------------------------------------------------------------------------------------------------------------------------------------------------------------------------------------------------------------------------------------------------------------------------------------------------------------------------|-------------------------------------------------------------------------------------------------------------------------------------------------------------------------------------------------------------------------------------------------------------------------------------------------------------------------------------------------------------------------------------------------------------------------------|
| <p>When during the past year did this adverse drug reaction happen?</p> <ol style="list-style-type: none"><li>1. 1438 Rajab</li><li>2. 1438 Shaban</li><li>3. 1438 Ramadan</li><li>4. 1438 Shawwal</li><li>5. 1438 Dhu al Qidah</li><li>6. 1438 Dhu al Hijah</li><li>7. 1439 Muḥarram</li><li>8. 1439 Safar</li><li>9. 1439 Rabi al awwal</li><li>10. 1439 Rabi al thani</li><li>11. 1439 Jumada al awwal</li><li>12. 1439 Jumada al thani</li><li>13. 1439 Rajab</li></ol> | <p>خلال العام الماضي في أي شهر حدث العرض الجانبي للدواء؟</p> <ol style="list-style-type: none"><li>1. 1438 رجب</li><li>2. 1438 شعبان</li><li>3. 1438 رمضان</li><li>4. 1438 شوال</li><li>5. 1438 ذو القعدة</li><li>6. 1438 ذو الحجة</li><li>7. 1439 محرم</li><li>8. 1439 صفر</li><li>9. 1439 ربيع الأول</li><li>10. 1439 ربيع الثاني</li><li>11. 1439 جمادى الأول</li><li>12. 1439 جمادى الآخرة</li><li>13. 1439 رجب</li></ol> |
|-----------------------------------------------------------------------------------------------------------------------------------------------------------------------------------------------------------------------------------------------------------------------------------------------------------------------------------------------------------------------------------------------------------------------------------------------------------------------------|-------------------------------------------------------------------------------------------------------------------------------------------------------------------------------------------------------------------------------------------------------------------------------------------------------------------------------------------------------------------------------------------------------------------------------|

What symptoms did you experience? Please list all of them. [CIRCLE ALL THAT APPLY]

[READ LIST OF NEEDED]

1. Nausea
2. Diarrhea
3. Dry mouth
4. Abdominal pain upper
5. Gastric disorder
6. Constipation
7. Vomiting
8. Fatigue
9. Pain
10. Hyperhidrosis
11. Nervous System Conditions
12. Dizziness
13. Headache
14. Tremor
15. Hypoesthesia
16. Anxiety
17. Insomnia
18. Depressed mood
19. Pruritus
20. Alopecia
21. Rash
22. Muscle spasms
23. Palpitations
24. Dizziness
25. Epistaxis
26. Erectile dysfunction
27. Metrorrhagia
28. Vascular Disorders
29. Weight Increased
30. Renal and Urinary Disorders
31. Eye disorders
32. Increased appetite
33. Immune system disorders
111. Other

ما هي الأعراض الجانبية للدواء التي ظهرت عليك؟ يرجى اختيار كل الأعراض. [ضع دائرة على كل ما ينطبق]

[اقرأ القائمة إذا لزم]

1. غثيان
2. إسهال
3. جفاف في الفم
4. ألم في أعلى البطن
5. اضطراب هضمي
6. إمساك
7. قيء
8. إرهاق
9. ألم
10. فرط في التعرق
11. حالات الجهاز العصبي
12. دوار
13. صداع
14. رعشة
15. نقص الإحساس
16. توتر
17. أرق
18. مزاج مكتئب
19. حكة
20. الثعلبة
21. طفح جلدي
22. تشنجات عضلية
23. خفقان
24. دوار
25. الرعاف
26. عجز انتصاب
27. نزيف بالرحم
28. اضطرابات الأوعية الدموية
29. زيادة في الوزن
30. اضطرابات شرجية وبولية
31. اضطرابات العين
32. زيادة الشهية
33. اضطرابات الجهاز المناعي
111. أخرى: \_\_\_\_\_

[THESE CATEGORIES ARE BASED ON THE ANATOMICAL THERAPEUTIC CHEMICAL CLASSIFICATION SYSTEM.]

[تعتمد هذه الفئات على نظام التصنيف الكيميائي العلاجي التشريحي.]

|                                                                                                                                                                                                                                                                                                                                                                                                                  |                                                                                                                                                                                                                                                                                                                          |
|------------------------------------------------------------------------------------------------------------------------------------------------------------------------------------------------------------------------------------------------------------------------------------------------------------------------------------------------------------------------------------------------------------------|--------------------------------------------------------------------------------------------------------------------------------------------------------------------------------------------------------------------------------------------------------------------------------------------------------------------------|
| <p>How did you realize that the drug was the cause of the adverse reaction? [READ THE STATEMENTS]</p> <ol style="list-style-type: none"><li>1. I took the medication then I felt it</li><li>2. It was the only change in my lifestyle</li><li>3. I read about it</li><li>4. The doctor told me I might develop such side effect</li><li>5. Someone else other than the doctor told me</li><li>6. Other</li></ol> | <p>كيف اكتشفت أن الدواء هو سبب العرض الجانبي –<br/>اقرأ العبارات</p> <ol style="list-style-type: none"><li>1. أخذت الدواء ثم شعرت بالأثر الجانبي</li><li>2. كان التغيير الوحيد</li><li>3. قرأت عنه</li><li>4. أخبرني الطبيب أنه قد يحدث هذا العرض الجانبي</li><li>5. شخص آخر غير الطبيب أخبرني</li><li>6. أخرى</li></ol> |
|------------------------------------------------------------------------------------------------------------------------------------------------------------------------------------------------------------------------------------------------------------------------------------------------------------------------------------------------------------------------------------------------------------------|--------------------------------------------------------------------------------------------------------------------------------------------------------------------------------------------------------------------------------------------------------------------------------------------------------------------------|

What drug or drugs do you think caused these symptoms? [Type the name in English]

ما هو الدواء أو الأدوية التي تعتقد أنها سببت هذه الأعراض [ اكتب اسم الدواء باللغة الانجليزية]

|                                                                                                                                                                                                                                                                                                              |                                                                                                                                                                                                                                                                              |
|--------------------------------------------------------------------------------------------------------------------------------------------------------------------------------------------------------------------------------------------------------------------------------------------------------------|------------------------------------------------------------------------------------------------------------------------------------------------------------------------------------------------------------------------------------------------------------------------------|
| <p>How did you obtain the drug that you think may have caused the side effect? [SELECT ONE]</p> <ol style="list-style-type: none"><li>1. Doctor</li><li>2. Pharmacy</li><li>3. Neighbors, family members, or friends</li><li>4. Social Media</li><li>5. Other sources</li><li>6. DK/Don't remember</li></ol> | <p>كيف حصلت على الدواء الذي تعتقد أنه سبب العرض الجانبي؟ [ اختر واحد]</p> <ol style="list-style-type: none"><li>1. الطبيب</li><li>2. الصيدلية</li><li>3. جيران، أفراد الأسرة، أو أصحاب</li><li>4. مواقع التواصل الاجتماعي</li><li>5. مصادر أخرى</li><li>6. لا أعلم</li></ol> |
|--------------------------------------------------------------------------------------------------------------------------------------------------------------------------------------------------------------------------------------------------------------------------------------------------------------|------------------------------------------------------------------------------------------------------------------------------------------------------------------------------------------------------------------------------------------------------------------------------|



|                                                                                                                                                                                                                                                                                                                                                                                                                                                                                            |                                                                                                                                                                                                                                                                                                                                                                                                                                                                                                                                                           |
|--------------------------------------------------------------------------------------------------------------------------------------------------------------------------------------------------------------------------------------------------------------------------------------------------------------------------------------------------------------------------------------------------------------------------------------------------------------------------------------------|-----------------------------------------------------------------------------------------------------------------------------------------------------------------------------------------------------------------------------------------------------------------------------------------------------------------------------------------------------------------------------------------------------------------------------------------------------------------------------------------------------------------------------------------------------------|
| <p>Was there a label on the drug- that has the patient and the medication information- or medication insert?</p> <ol style="list-style-type: none"> <li>1. Yes, drug label</li> <li>2. Yes, medication insert</li> <li>3. No</li> <li>4. Dk/refused</li> </ol> <p><b>[IF YES, ASK THE FOLLOWING QUESTION]</b></p> <p>Did you follow the instructions on the label when taking the drug?</p> <ol style="list-style-type: none"> <li>1. Yes</li> <li>2. No</li> <li>3. Dk/refused</li> </ol> | <p>هل كان هناك ملصق على الدواء (علية معلومات المريض وإرشادات الاستخدام) أو نشرة داخلية المرفقة مع الدواء؟</p> <ol style="list-style-type: none"> <li>1. نعم, ملصق على الدواء [اسأل السؤال التالي]</li> <li>2. نعم, نشرة داخلية المرفقة مع الدواء [اسأل السؤال التالي]</li> <li>3. لا [لا تسأل السؤال التالي]</li> <li>4. لا أعرف [ لا تسأل السؤال التالي ]</li> </ol> <p>هل اتبعت التعليمات الموجودة على الملصق أو النشرة الداخلية عند تناول الدواء؟</p> <ol style="list-style-type: none"> <li>1. نعم</li> <li>2. لا</li> <li>3. لا أعرف/أرفض</li> </ol> |
|--------------------------------------------------------------------------------------------------------------------------------------------------------------------------------------------------------------------------------------------------------------------------------------------------------------------------------------------------------------------------------------------------------------------------------------------------------------------------------------------|-----------------------------------------------------------------------------------------------------------------------------------------------------------------------------------------------------------------------------------------------------------------------------------------------------------------------------------------------------------------------------------------------------------------------------------------------------------------------------------------------------------------------------------------------------------|

|                                                                                                                                                                                                                  |                                                                                                                                                                                                   |
|------------------------------------------------------------------------------------------------------------------------------------------------------------------------------------------------------------------|---------------------------------------------------------------------------------------------------------------------------------------------------------------------------------------------------|
| <p>This next section talks about how severe the side effect was.</p> <p>Was the side effect life-threatening?</p> <ol style="list-style-type: none"> <li>1. Yes</li> <li>2. No</li> <li>3. Dk/refused</li> </ol> | <p>القسم التالي يناقش شدة هذا العرض الجانبي.</p> <p>هل كان العرض الجانبي للدواء مهدد للحياة؟</p> <ol style="list-style-type: none"> <li>1. نعم</li> <li>2. لا</li> <li>3. لا أعرف/أرفض</li> </ol> |
|------------------------------------------------------------------------------------------------------------------------------------------------------------------------------------------------------------------|---------------------------------------------------------------------------------------------------------------------------------------------------------------------------------------------------|

|                                                                                                                                       |                                                                                                                                       |
|---------------------------------------------------------------------------------------------------------------------------------------|---------------------------------------------------------------------------------------------------------------------------------------|
| <p>Did it require hospitalization?</p> <ol style="list-style-type: none"> <li>1. Yes</li> <li>2. No</li> <li>3. Dk/refused</li> </ol> | <p>هل احتجت للإقامة في المستشفى؟</p> <ol style="list-style-type: none"> <li>1. نعم</li> <li>2. لا</li> <li>3. لا أعرف/أرفض</li> </ol> |
|---------------------------------------------------------------------------------------------------------------------------------------|---------------------------------------------------------------------------------------------------------------------------------------|

|                                                                                                                                              |                                                                                                                                  |
|----------------------------------------------------------------------------------------------------------------------------------------------|----------------------------------------------------------------------------------------------------------------------------------|
| <p>Did it result in permanent disability?</p> <ol style="list-style-type: none"> <li>0. Yes</li> <li>1. No</li> <li>2. Dk/refused</li> </ol> | <p>هل نتج عنه عاهة مستديمة؟</p> <ol style="list-style-type: none"> <li>0. نعم</li> <li>1. لا</li> <li>2. لا أعرف/أرفض</li> </ol> |
|----------------------------------------------------------------------------------------------------------------------------------------------|----------------------------------------------------------------------------------------------------------------------------------|

|                                                                                                                                                                         |                                                                                                                                                                   |
|-------------------------------------------------------------------------------------------------------------------------------------------------------------------------|-------------------------------------------------------------------------------------------------------------------------------------------------------------------|
| <p>Did it affect your pregnancy?</p> <ol style="list-style-type: none"> <li>0. Yes</li> <li>1. No</li> <li>2. NA [IF MALE RESPONDENT]</li> <li>3. Dk/refused</li> </ol> | <p>هل أثر على الحمل؟</p> <ol style="list-style-type: none"> <li>0. نعم</li> <li>1. لا</li> <li>2. غير مطابق [ إذا كان ذكراً ]</li> <li>3. لا أعرف/أرفض</li> </ol> |
|-------------------------------------------------------------------------------------------------------------------------------------------------------------------------|-------------------------------------------------------------------------------------------------------------------------------------------------------------------|

|                                                                                                                                                                      |                                                                                                                                                                                                         |
|----------------------------------------------------------------------------------------------------------------------------------------------------------------------|---------------------------------------------------------------------------------------------------------------------------------------------------------------------------------------------------------|
| <p>Did it require medical intervention to prevent further damage?</p> <ol style="list-style-type: none"> <li>1. Yes</li> <li>2. No</li> <li>3. Dk/refused</li> </ol> | <p>هل احتاج للتدخل الطبي للحد من المزيد من الضرر؟</p> <ol style="list-style-type: none"> <li>1. نعم [ اسأل السؤال التالي ]</li> <li>2. لا [ لا تسأل السؤال التالي ]</li> <li>3. لا أعرف/أرفض</li> </ol> |
|----------------------------------------------------------------------------------------------------------------------------------------------------------------------|---------------------------------------------------------------------------------------------------------------------------------------------------------------------------------------------------------|

|                                                                                                                                                                                                                                                                      |                                                                                                                                                                                                                                          |
|----------------------------------------------------------------------------------------------------------------------------------------------------------------------------------------------------------------------------------------------------------------------|------------------------------------------------------------------------------------------------------------------------------------------------------------------------------------------------------------------------------------------|
| <p>What medical care did you receive for this reaction? <b>[CHECK ALL THAT APPLY]</b></p> <ol style="list-style-type: none"> <li>1. No medical treatment</li> <li>2. Medical monitoring</li> <li>3. Medication intervention</li> <li>4. Medical procedure</li> </ol> | <p>ما هي الرعاية الطبية التي حصلت عليها لهذا العرض الجانبي؟ <b>[اختر كل ما ينطبق]</b></p> <ol style="list-style-type: none"> <li>1. بدون علاج طبي</li> <li>2. ملاحظة طبية</li> <li>3. تدخل علاجي دوائي</li> <li>4. عملية طبية</li> </ol> |
|----------------------------------------------------------------------------------------------------------------------------------------------------------------------------------------------------------------------------------------------------------------------|------------------------------------------------------------------------------------------------------------------------------------------------------------------------------------------------------------------------------------------|

|                                                                                                                                                                                                                                                                          |                                                                                                                                                                                                                                          |
|--------------------------------------------------------------------------------------------------------------------------------------------------------------------------------------------------------------------------------------------------------------------------|------------------------------------------------------------------------------------------------------------------------------------------------------------------------------------------------------------------------------------------|
| <p>Drug poisoning is a strong reaction of too high a dose of one or more drugs. Do you believe the primary drug reaction you reported was a result of drug poisoning?</p> <ol style="list-style-type: none"> <li>1. Yes</li> <li>2. No</li> <li>3. Dk/refused</li> </ol> | <p>تسمم الدواء هو رد فعل قوي لجرعة عالية من لدواء واحد أو أكثر. هل تعتقد أن العرض الجانبي الأساسي الذي حدث لك كان نتيجة تسمم دوائي؟</p> <ol style="list-style-type: none"> <li>1. نعم</li> <li>2. لا</li> <li>3. لا أعرف/أرفض</li> </ol> |
|--------------------------------------------------------------------------------------------------------------------------------------------------------------------------------------------------------------------------------------------------------------------------|------------------------------------------------------------------------------------------------------------------------------------------------------------------------------------------------------------------------------------------|

|                                                                                                                                                                                                                                                                                                         |                                                                                                                                                                                                                                                                                           |
|---------------------------------------------------------------------------------------------------------------------------------------------------------------------------------------------------------------------------------------------------------------------------------------------------------|-------------------------------------------------------------------------------------------------------------------------------------------------------------------------------------------------------------------------------------------------------------------------------------------|
| <p>Some drugs can cause dependence, meaning that you cannot discontinue drug use even if you wanted to. Do you perceive that the primary drug reaction you reported was a result of drug dependence?</p> <ol style="list-style-type: none"> <li>1. Yes</li> <li>2. No</li> <li>3. Dk/refused</li> </ol> | <p>بعض الأدوية يمكن أن تؤدي إلى الاعتمادية، بمعنى أنك لا تستطيع التوقف عن تناول الدواء حتى إذا أردت ذلك. هل تعتقد أن العرض الجانبي الأساسي الذي شعرت به نتيجة للاعتمادية على الدواء؟</p> <ol style="list-style-type: none"> <li>1. نعم</li> <li>2. لا</li> <li>3. لا أعرف/أرفض</li> </ol> |
|---------------------------------------------------------------------------------------------------------------------------------------------------------------------------------------------------------------------------------------------------------------------------------------------------------|-------------------------------------------------------------------------------------------------------------------------------------------------------------------------------------------------------------------------------------------------------------------------------------------|

Please rate the following statements as to how strongly you agree with them.

| Statement                                                  | 5<br>Strongly<br>Agree | 4<br>Agree | 3<br>Neither<br>Agree nor<br>Disagree | 2<br>Disagree | 1<br>Strongly<br>Disagree |
|------------------------------------------------------------|------------------------|------------|---------------------------------------|---------------|---------------------------|
| As a result of this drug reaction, I suffered emotionally  | 5                      | 4          | 3                                     | 2             | 1                         |
| As a result of this drug reaction, I suffered financially. | 5                      | 4          | 3                                     | 2             | 1                         |
| As a result of this drug reaction, I suffered physically.  | 5                      | 4          | 3                                     | 2             | 1                         |

يرجى تقييم العبارات التالية حسب شدة اتفاقك معها

| 1<br>لا أوافق بشدة | 2<br>لا أوافق | 3<br>محايد | 4<br>أوافق | 5<br>أوافق بشدة | العبرة                              |
|--------------------|---------------|------------|------------|-----------------|-------------------------------------|
| 1                  | 2             | 3          | 4          | 5               | عانيت نفسياً بسبب هذا العرض الجانبي |
| 1                  | 2             | 3          | 4          | 5               | عانيت مالياً بسبب هذا العرض الجانبي |
| 1                  | 2             | 3          | 4          | 5               | عانيت جسدياً بسبب هذا العرض الجانبي |

|                                                                                                                                                                                                                                                                                                                                                                                                                                                                                                                                                                                                                                                                                                                               |                                                                                                                                                                                                                                                                                                                                                                                                                                                                                                                                                                                                                                                                                                                                                                                                                  |
|-------------------------------------------------------------------------------------------------------------------------------------------------------------------------------------------------------------------------------------------------------------------------------------------------------------------------------------------------------------------------------------------------------------------------------------------------------------------------------------------------------------------------------------------------------------------------------------------------------------------------------------------------------------------------------------------------------------------------------|------------------------------------------------------------------------------------------------------------------------------------------------------------------------------------------------------------------------------------------------------------------------------------------------------------------------------------------------------------------------------------------------------------------------------------------------------------------------------------------------------------------------------------------------------------------------------------------------------------------------------------------------------------------------------------------------------------------------------------------------------------------------------------------------------------------|
| <p>Are you aware that you can report side effects from drugs to the Saudi Food and Drug Authority?</p> <ol style="list-style-type: none"> <li>1. Yes</li> <li>2. No</li> <li>3. Dk/refused</li> </ol> <p><b>[IF YES, ASK]</b></p> <p>Have you ever reported a reaction from a drug to the Saudi Food and Drug Authority? <b>[IF THEY ASK – THE REPORT COULD BE ABOUT SELF OR ANYONE ELSE]</b></p> <ol style="list-style-type: none"> <li>1. Yes</li> <li>2. No</li> <li>3. Dk/refused</li> </ol> <p><b>[IF YES, ASK]</b></p> <p>Did you report it by calling 19999 number or by filling the form on-line?</p> <ol style="list-style-type: none"> <li>1. Phone call</li> <li>2. On-line Form</li> <li>3. Dk/refused</li> </ol> | <p>هل تعلم أنك تستطيع الإبلاغ عن الأعراض الجانبية للأدوية للهيئة العامة للغذاء والدواء؟</p> <ol style="list-style-type: none"> <li>1. نعم [اسأل السؤال التالي]</li> <li>2. لا [لا تسأل السؤال التالي]</li> <li>3. لا أعرف/أرفض [لا تسأل السؤال التالي]</li> </ol> <p>هل قمت من قبل بالإبلاغ عن عرض جانبي لدواء للهيئة العامة للغذاء والدواء؟ [إذا سألتها – يمكن أن يكون البلاغ لشخصك أو نيابة عن شخص آخر]</p> <ol style="list-style-type: none"> <li>1. نعم</li> <li>2. لا [لا تسأل السؤال التالي]</li> <li>3. لا أعرف/أرفض [لا تسأل السؤال التالي]</li> </ol> <p>هل قمت بالإبلاغ عن الأعراض الجانبية للدواء من خلال الاتصال برقم 19999 أم من خلال ملء استمارة على موقع الهيئة؟</p> <ol style="list-style-type: none"> <li>1. مكالمة هاتفية</li> <li>2. استمارة على الإنترنت</li> <li>3. لا أعرف/أرفض</li> </ol> |
|-------------------------------------------------------------------------------------------------------------------------------------------------------------------------------------------------------------------------------------------------------------------------------------------------------------------------------------------------------------------------------------------------------------------------------------------------------------------------------------------------------------------------------------------------------------------------------------------------------------------------------------------------------------------------------------------------------------------------------|------------------------------------------------------------------------------------------------------------------------------------------------------------------------------------------------------------------------------------------------------------------------------------------------------------------------------------------------------------------------------------------------------------------------------------------------------------------------------------------------------------------------------------------------------------------------------------------------------------------------------------------------------------------------------------------------------------------------------------------------------------------------------------------------------------------|

|                                                                                                                                                                                                                                                                           |                                                                                                                                                                                                                                                          |
|---------------------------------------------------------------------------------------------------------------------------------------------------------------------------------------------------------------------------------------------------------------------------|----------------------------------------------------------------------------------------------------------------------------------------------------------------------------------------------------------------------------------------------------------|
| <p>How easy was it for you to report the side effect to the Saudi Food and Drug Authority?</p> <ol style="list-style-type: none"> <li>1. Very easy</li> <li>2. Somewhat easy</li> <li>3. Neither easy nor hard</li> <li>4. Somewhat hard</li> <li>5. Very hard</li> </ol> | <p>ما مدى سهولة الإبلاغ عن الأعراض الجانبية للهيئة العامة للغذاء والدواء؟</p> <ol style="list-style-type: none"> <li>1. سهل للغاية</li> <li>2. سهل إلى حد ما</li> <li>3. ليس بالسهل أو الصعب</li> <li>4. صعب إلى حد ما</li> <li>5. صعب للغاية</li> </ol> |
|---------------------------------------------------------------------------------------------------------------------------------------------------------------------------------------------------------------------------------------------------------------------------|----------------------------------------------------------------------------------------------------------------------------------------------------------------------------------------------------------------------------------------------------------|

|                                                                                                                                 |                                                                                                                                                        |
|---------------------------------------------------------------------------------------------------------------------------------|--------------------------------------------------------------------------------------------------------------------------------------------------------|
| <p>Are will you willing to be contacted by SFDA to know more about your side effect?</p> <p>(Open box-10 digits entry only)</p> | <p>هل تسمح بالتواصل معك في حال رغبت الهيئة العامة للغذاء والدواء لمعرفة المزيد عن أعراضك الجانبية؟</p> <p>(ادخل رقم الجوال المكون من 10 أرقام فقط)</p> |
|---------------------------------------------------------------------------------------------------------------------------------|--------------------------------------------------------------------------------------------------------------------------------------------------------|
